# Supplementary material
Source: PubMed Central journal article supplement (PMC8387419)
Supplement: NIHMS1719752-supplement-1.pdf [file NIHMS1719752-supplement-1.pdf]

**PEM**

M1 (IFN $\gamma$ /LPS)

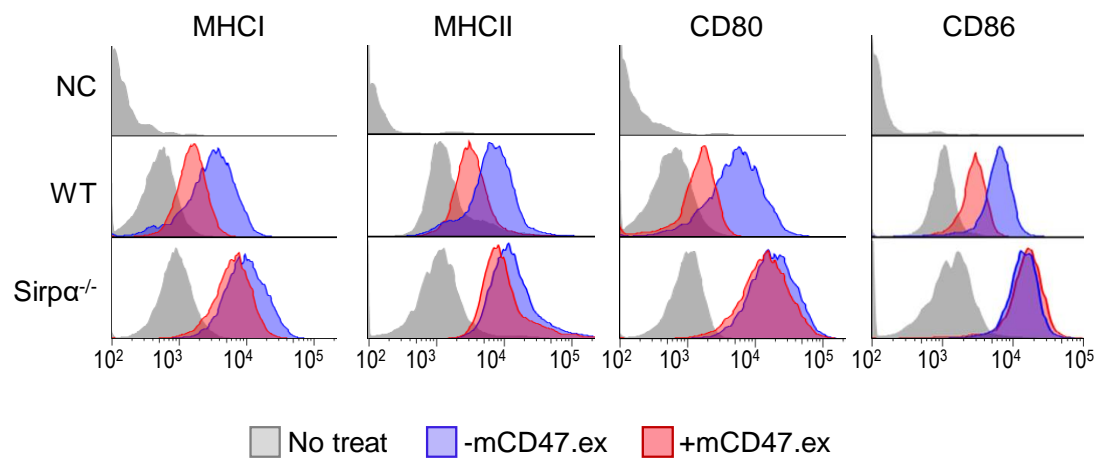

**Supplementary Figure S1.** The levels of MHC-I, MHC-II, CD80 and CD86 on WT and Sirp $\alpha^{-/-}$  PEM treated with IFN $\gamma$  (20 ng/ml)/LPS (100 ng/ml).

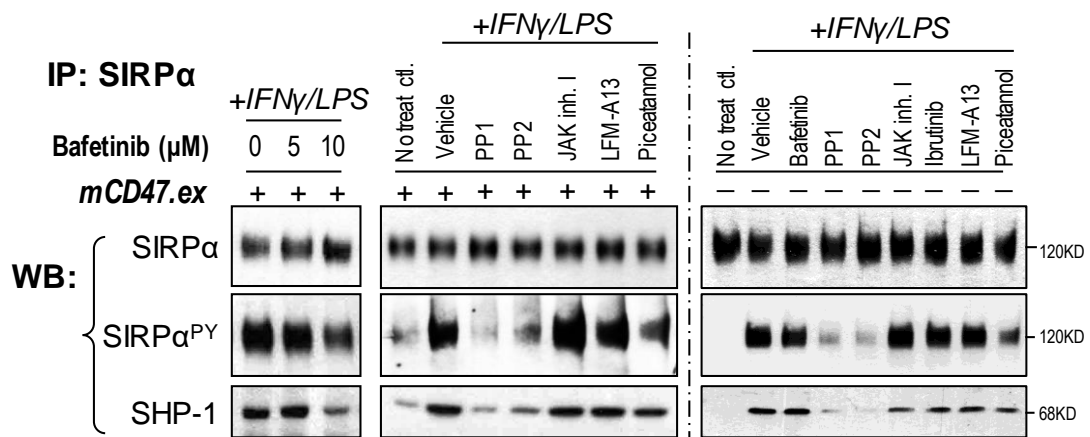

**Supplementary Figure S2.** Effect of various tyrosine kinases inhibitors on M1 activation-induced SIRP $\alpha$  phosphorylation and the association of SIRP $\alpha$  with SHP-1 in the presence and absence of mCD47.ex.
